# Supplementary material
Source: PubMed Central journal article supplement (PMC4561733)
Supplement: MCB.00509-15_zmb999100965so1.pdf [file MCB.00509-15_zmb999100965so1.pdf]

**Table S1. Primers used in this study**

| <b>Primer</b>                                             | <b>Sequence</b>                | <b>Reference</b> |
|-----------------------------------------------------------|--------------------------------|------------------|
| <b><i>V(D)J Recombination Assay</i></b>                   |                                |                  |
| <b><u>D<sub>Q52</sub> GL configuration:</u></b>           |                                |                  |
| DH-Q52-Fw                                                 | CCACAGGCTCGAGAACTTTAGCG        | 1                |
| DQ52-Rev                                                  | TTCTTCTCTGCACTGTCTCCTGACC      | This study       |
| <b><u>J<sub>H1</sub> GL configuration:</u></b>            |                                |                  |
| JH1-Fw                                                    | GGTGAGTCCTGCATCTGGGG           | This study       |
| JH1-Rev                                                   | GACTGCCTCTTTTCTGGGAGTG         | This study       |
| <b><u>V-D Recombination:</u></b>                          |                                |                  |
| V <sub>H</sub> 81X-Fw                                     | GGAGTTGGTCGCAGCCATTAATAGT      | 2                |
| DQ52-Rev                                                  | CATCCACCCTTCTGATGCTTGCAAT      | 2                |
| <b><u>D-J<sub>H</sub> Recombination:</u></b>              |                                |                  |
| DHL-Fw                                                    | TTTTTGCAAGGGATCTACTACTGTG      | 1                |
| JH1R                                                      | GACTGCCTCTTTTCTGGGAGTG         | 3                |
| JH2R4                                                     | TAGACCCCTGACAATAAATGA          | 3                |
| JH3R1                                                     | CGATAGACCCTGGACAAGATTC         | 3                |
| JH4R2                                                     | TATTTCCCAACTTCTCTCAGCC         | 3                |
| <b><u>V<sub>H</sub>-DJ<sub>H</sub> Recombination:</u></b> |                                |                  |
| VHJ558-Fw                                                 | GCGAAGCTTARGCCTGGGRCTTCAGTGAAG | 1                |
| JH1R                                                      | GACTGCCTCTTTTCTGGGAGTG         | 3                |
| JH2R1                                                     | CTGAGGAGACTGTGAGAGTGGTG        | 3                |
| JH3R5                                                     | CAGTTCTAATGTCACCACAGACC        | 3                |
| JH4R1                                                     | CTGAGGAGACGGTGACTGAGGT         | 3                |
| <b><u>Normalization:</u></b>                              |                                |                  |
| HS5-Fw                                                    | ACTCAAGGGTTAAGAGCACTGGCT       | 3                |
| HS5-Rev                                                   | AATCCTTCAGGGCATCCTGGAAT        | 3                |

***Transcription Analysis***

**GL Transcription at the *IgH* locus:**

|                                   |                            |            |
|-----------------------------------|----------------------------|------------|
| <b>μ0-Fw</b>                      | GGACTTTGGGCTGGGTTTGG       | 1          |
| <b>Iμ-Fw</b>                      | CTCTGGCCCTGCTTATTGTTG      | 4          |
| <b>Cμ-Rev</b>                     | GAAGACATTTGGGAAGGACTGACT   | 4          |
| <b>AS DSP-Fw</b>                  | ACTTGGCAGGGATTTTTGTC       | 2          |
| <b>AS DSP-Rev</b>                 | TGAAGAGTCTGCTGGGCATA       | 2          |
| <b>AS VH5' VH81X-Fw</b>           | AGAAGAGCTGGACAGATGTTATAC   | This study |
| <b>AS VH5' VH81X-Rev</b>          | GGCTGGATTCTCGAAAGATAA      | This study |
| <b>AS VH5' J606-Fw</b>            | AGGTTAGTCTGGTGAGGCATA      | This study |
| <b>AS VH5' J606-Rev</b>           | CCAACCTACTCTAACCTCTGCTA    | This study |
| <b>AS J606-Fw</b>                 | GTCAGTAGACCACACAAGTAGG     | This study |
| <b>AS J606-Rev</b>                | GTCTTGAGAATCTAGGGCTGAC     | This study |
| <b>AS J558 5'int-Fw</b>           | ATCCCCTCCAATAGGAAA         | 5          |
| <b>AS J558 5'int-Rev</b>          | TGTCAATCACAATGGGCATC       | 5          |
| <b>AS PAIR4 ex1-2-Fw</b>          | ATGGGGCACATAGGTTCTTCC      | This study |
| <b>AS PAIR4 ex3-Rev</b>           | GGACATCTGAGAGATCATTGAACATC | This study |
| <b>dV<sub>H</sub>J558 GLT-Fw</b>  | ATGGGATGGAGCTGGATCTT       | 5          |
| <b>dV<sub>H</sub>J558 GLT-Rev</b> | CTCAGGATGTGGTTACAACACTGTG  | 1          |
| <b>HS4-F1</b>                     | CAGGCAAGGTGATGTGGATGAGAG   | This study |
| <b>HS4-R2</b>                     | AGGTCTACACAGGGGCTCTG       | This study |
| <b>HS3b-F1</b>                    | TGAGGGCCAGGGCCCAATGA       | This study |
| <b>HS3b-R1</b>                    | GGATCTCGGTCTGGTAACTGGCT    | This study |

**GL transcription at the *Igκ* locus :**

|                      |                                |   |
|----------------------|--------------------------------|---|
| <b>dVκ 1-135-Fw</b>  | GTGCAATCTGGAGAGGAGCAG          | 6 |
| <b>dVκ 1-135-Rev</b> | CCCTCCCTCTCACACAGACAC          | 6 |
| <b>pVκ 3-7-Fw</b>    | CTGCTATGGGTGCTGCTGCTCTG        | 7 |
| <b>pVκ 3-7-Rev</b>   | GGATGGATGTTGAGG(CG)TGAAGTCTG   | 7 |
| <b>Jκ0.8-Fw</b>      | CAGTGAGGAGGGTTTTGTACAGCCAGACAG | 8 |
| <b>Jκ1.1-Rev</b>     | CATGGAAGTGAAATGGCTGTAGCCTAATG  | 8 |
| <b>CκR</b>           | CTCATTCTGTTGAAGCTCTTGACAATGGG  | 8 |

**VDJ-Cμ Transcription:**

|                  |                                |   |
|------------------|--------------------------------|---|
| <b>VHJ558-Fw</b> | GCGAAGCTTARGCCTGGGRCTTCAGTGAAG | 1 |
|------------------|--------------------------------|---|

|                              |                           |            |
|------------------------------|---------------------------|------------|
| <b>Cμ-Rev</b>                | GAAGACATTTGGGAAGGACTGACT  | 4          |
| <b><u>Normalization:</u></b> |                           |            |
| <b>Actin 4-Fw</b>            | CTGACAGACTACCTCATGAAGATCC | This study |
| <b>Actin 5-Rev</b>           | CATGGATGCCACAGGATTCC      | This study |
| <b>Gapdh-Fw</b>              | GGTGAAGGTCGGTGTGAACG      | This study |
| <b>Gapdh-Rev</b>             | CTCGCTCCTGGAAGATGGTG      | This study |

### References associated with table S1.

1. **Perlot T, Alt FW, Bassing CH, Suh H, Pinaud E.** 2005. Elucidation of IgH intronic enhancer functions via germ-line deletion. *Proc Natl Acad Sci USA* **102**:14362-14367.
2. **Guo C, Yoon HS, Franklin A, Jain S, Ebert A, Cheng HL, Hansen E, Despo O, Bossen C, Vettermann C, Bates JG, Richards N, Myers D, Patel H, Gallagher M, Schlissel MS, Murre C, Busslinger M, Giallourakis CC, Alt FW.** 2011. CTCF-binding elements mediate control of V(D)J recombination. *Nature* **477**:424-430.
3. **Braikia F-Z, Chemin G, Moutahir M, Khamlichi AA.** 2014. Quantification of V(D)J recombination by real-time quantitative PCR. *Immunol Lett* **162**:119-123.
4. **Haddad D, Oruc Z, Puget N, Laviolette-Malirat N, Philippe M, Carrion C, Le Bert M, Khamlichi AA.** 2011. Sense transcription through the S region is essential for immunoglobulin class switch recombination. *EMBO J* **30**:1608-1620.
5. **Bolland DJ, Wood AL, Johnston CM, Bunting SF, Morgan G, Chakalova L, Fraser PJ, Corcoran AE.** 2004. Antisense intergenic transcription in V(D)J recombination. *Nat Immunol* **5**:630-637.
6. **Inlay MA, Lin T, Gao HH, Xu Y.** 2006. Critical roles of the immunoglobulin intronic enhancers in maintaining the sequential rearrangement of IgH and Igh loci. *J Exp Med* **203**:1721-1732.

7. **Düber S Engel H, Rolink A, Kretschmer K, Weiss S.** 2003. Germline transcripts of immunoglobulin light chain variable regions are structurally diverse and differentially expressed. *Mol Immunol* **40**: 509-516.

8. **Grawunder U, Rolink A, Melchers F.** 1995. Induction of sterile transcription from the kappa L chain gene locus in V(D)J recombinase-deficient progenitor B cells. *Int Immunol* **7**: 1915-1925.
